# Supplementary material for: Molecular design towards suppressing electron recombination and enhancing the light-absorbing ability of dyes for use in sensitized solar cells: a theoretical investigation
Source: Royal Society of Chemistry journal article supplement (doi:10.1039/c8nj02188k), 2018-01-01
Supplement: c8nj02188k1.pdf [file c8nj02188k1.pdf]

## Electronic Supplementary Information

### **Molecular design toward suppressing electron recombination and enhancing light-absorbing ability of dye for sensitized solar cell:**

#### **A theoretical investigation**

Ping Li, Chongping Song, Zhixiang Wang, Jiaqi Li, and Houyu Zhang\*

*State key laboratory of supramolecular structure and materials, Institute of  
theoretical chemistry, Jilin University, Changchun 130012, P. R. China*

E-mail: [hoyuzhang@jlu.edu.cn](mailto:hoyuzhang@jlu.edu.cn)

## Contents:

**Fig. S1** Structures of dye-TiO<sub>2</sub> complex for **1** and **2**.

**Fig. S2** Calculated energy levels for (TiO<sub>2</sub>)<sub>16</sub> cluster and dyes **1** and **2**.

**Fig. S3** Calculated LUMO levels for the dyes **2**, **3T** and **4T**.

**Fig. S4** Optimized structures of all the designed dyes.

**Fig. S5** Calculated energy levels of HOMO for the series dyes **A**, **B** and **D**.

**Fig. S6** Spatial distributions of HOMO for some selected dyes.

**Table S1** Calculated HOMO energy levels of dyes **1** and **2** with different functionals in dichloromethane (CH<sub>2</sub>Cl<sub>2</sub>) solution.

**Table S2** Calculated maximum absorption wavelengths ( $\lambda_{\max}$ ) of dyes **1** and **2** with different functionals in CH<sub>2</sub>Cl<sub>2</sub> solution.

**Table S3** Computed  $Q_{\text{HOMO}}$ , key parameters related to light absorption properties and the lifetimes of the S<sub>1</sub> excited state for the designed dyes **3T**, **4T** and reference dye **2**.

**Table S4** Computed energy levels of LUMO, the lifetimes  $\tau$  of the S<sub>1</sub> excited state, and dominant excitations corresponding to S<sub>0</sub>→S<sub>1</sub> for the series dyes **A-F**.

**Table S5** Calculated  $\Lambda$ ,  $\Delta G^0$ , EXP and  $\frac{\text{exp}}{\sqrt{\Lambda}}$  values for reference dye **2** and dyes **A1**, **B1** and **C1**.

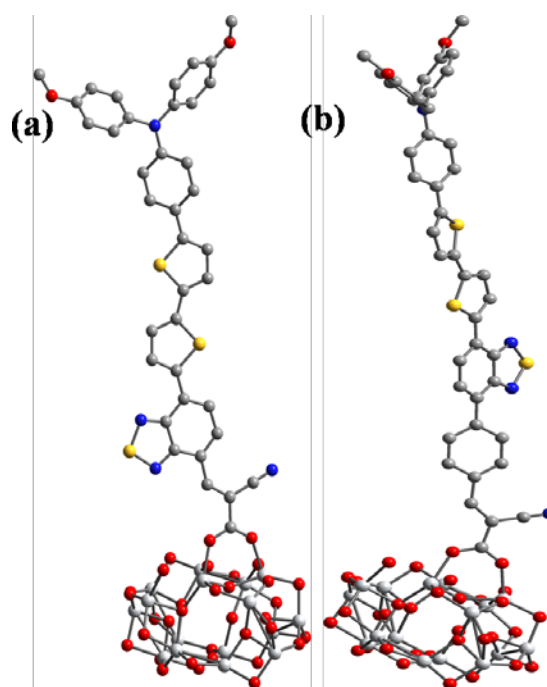

The geometry of dye-TiO<sub>2</sub> (neutral TiO<sub>2</sub>, neutral dye) is obtained from attaching dye with TiO<sub>2</sub> cluster followed by optimization. The structure of dye<sup>+</sup>-TiO<sub>2</sub> (neutral TiO<sub>2</sub>, cationic dye), a pre-optimized cationic dye is fitted into pre-optimized dye-TiO<sub>2</sub> without further optimization.

**Fig. S1** Structures of dye-TiO<sub>2</sub> complex for (a)1<sup>+</sup>-TiO<sub>2</sub> and 2<sup>+</sup>-TiO<sub>2</sub>.

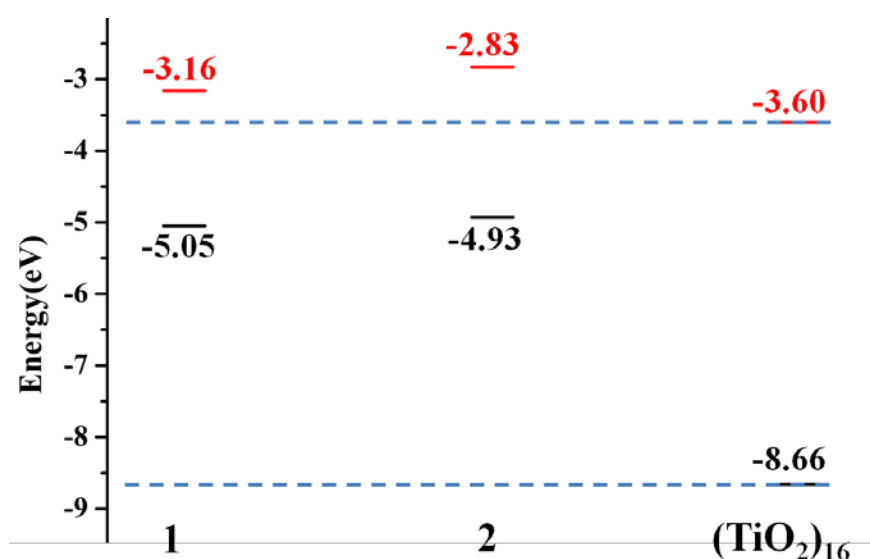

The optimization of (TiO<sub>2</sub>)<sub>16</sub> was done at PBE0/6-31G(d, p) level with Gaussian program. The calculated LUMO energy levels of the dyes are above the conduction band of (TiO<sub>2</sub>)<sub>16</sub>, and the HOMOs of the dyes are in the gap of (TiO<sub>2</sub>)<sub>16</sub>, thus we can use the cluster for electronic processes responsible for DSSC functionality.

**Fig. S2** Calculated energy levels for (TiO<sub>2</sub>)<sub>16</sub> cluster and dyes 1 and 2.

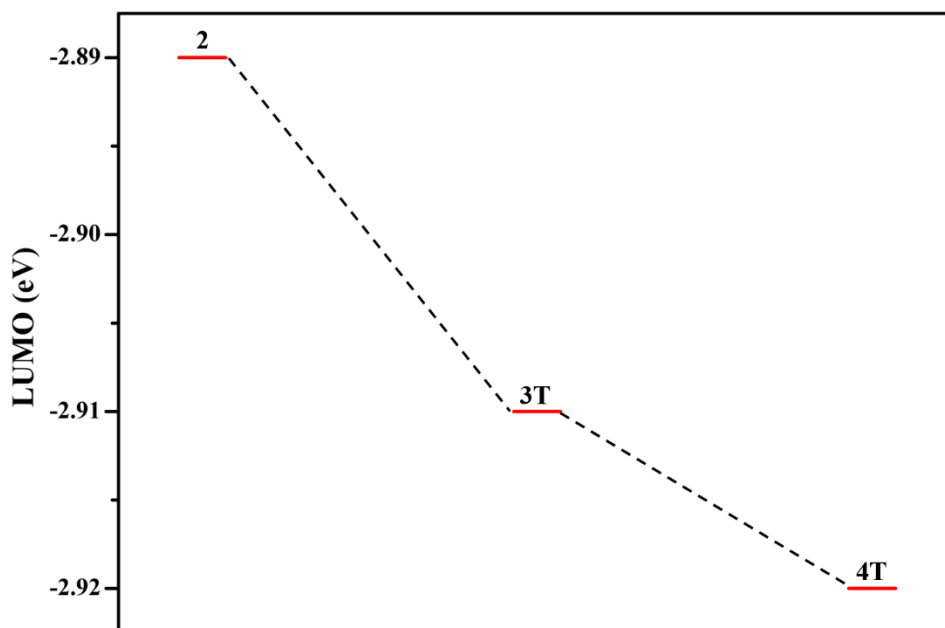

Fig. S3 Calculated LUMO levels for the dyes 2, 3T and 4T.

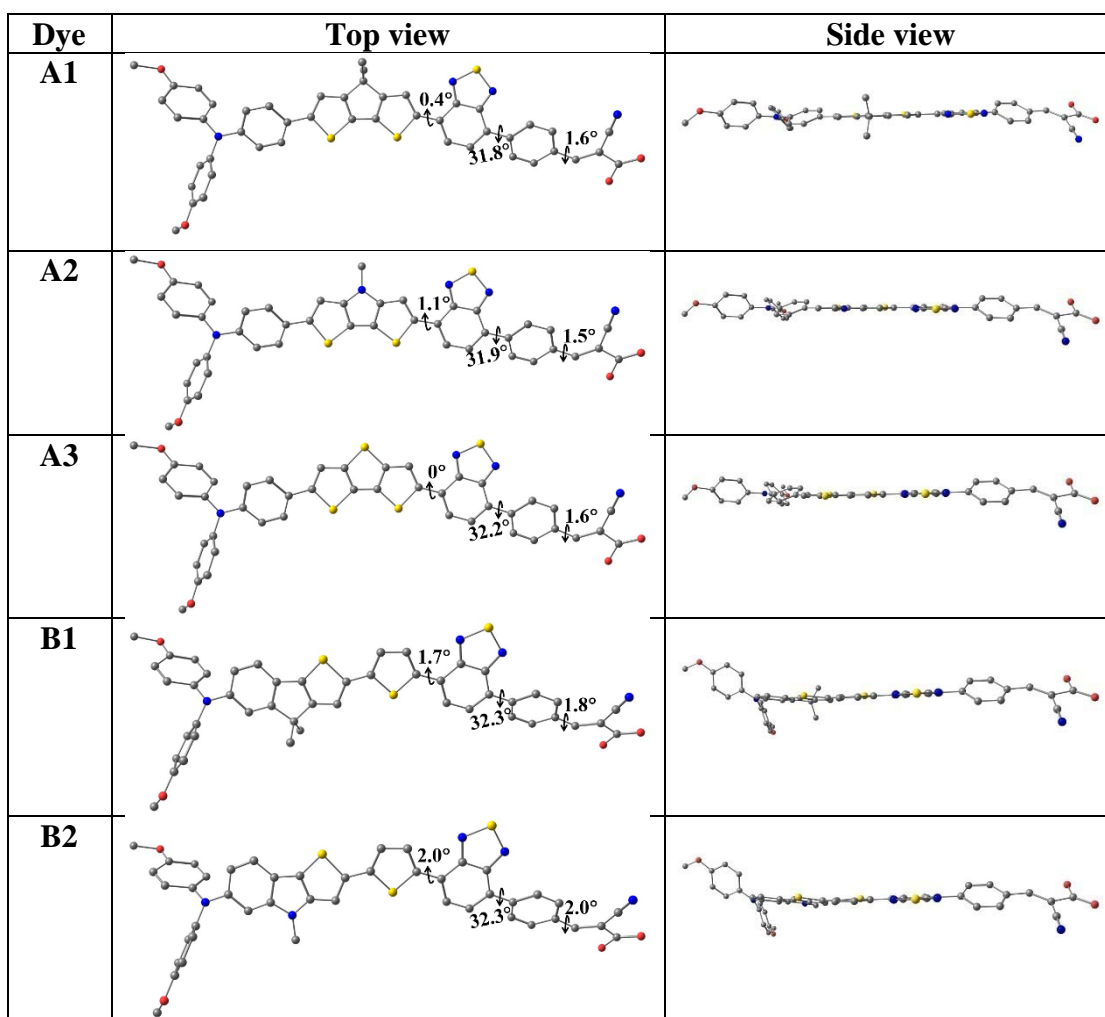

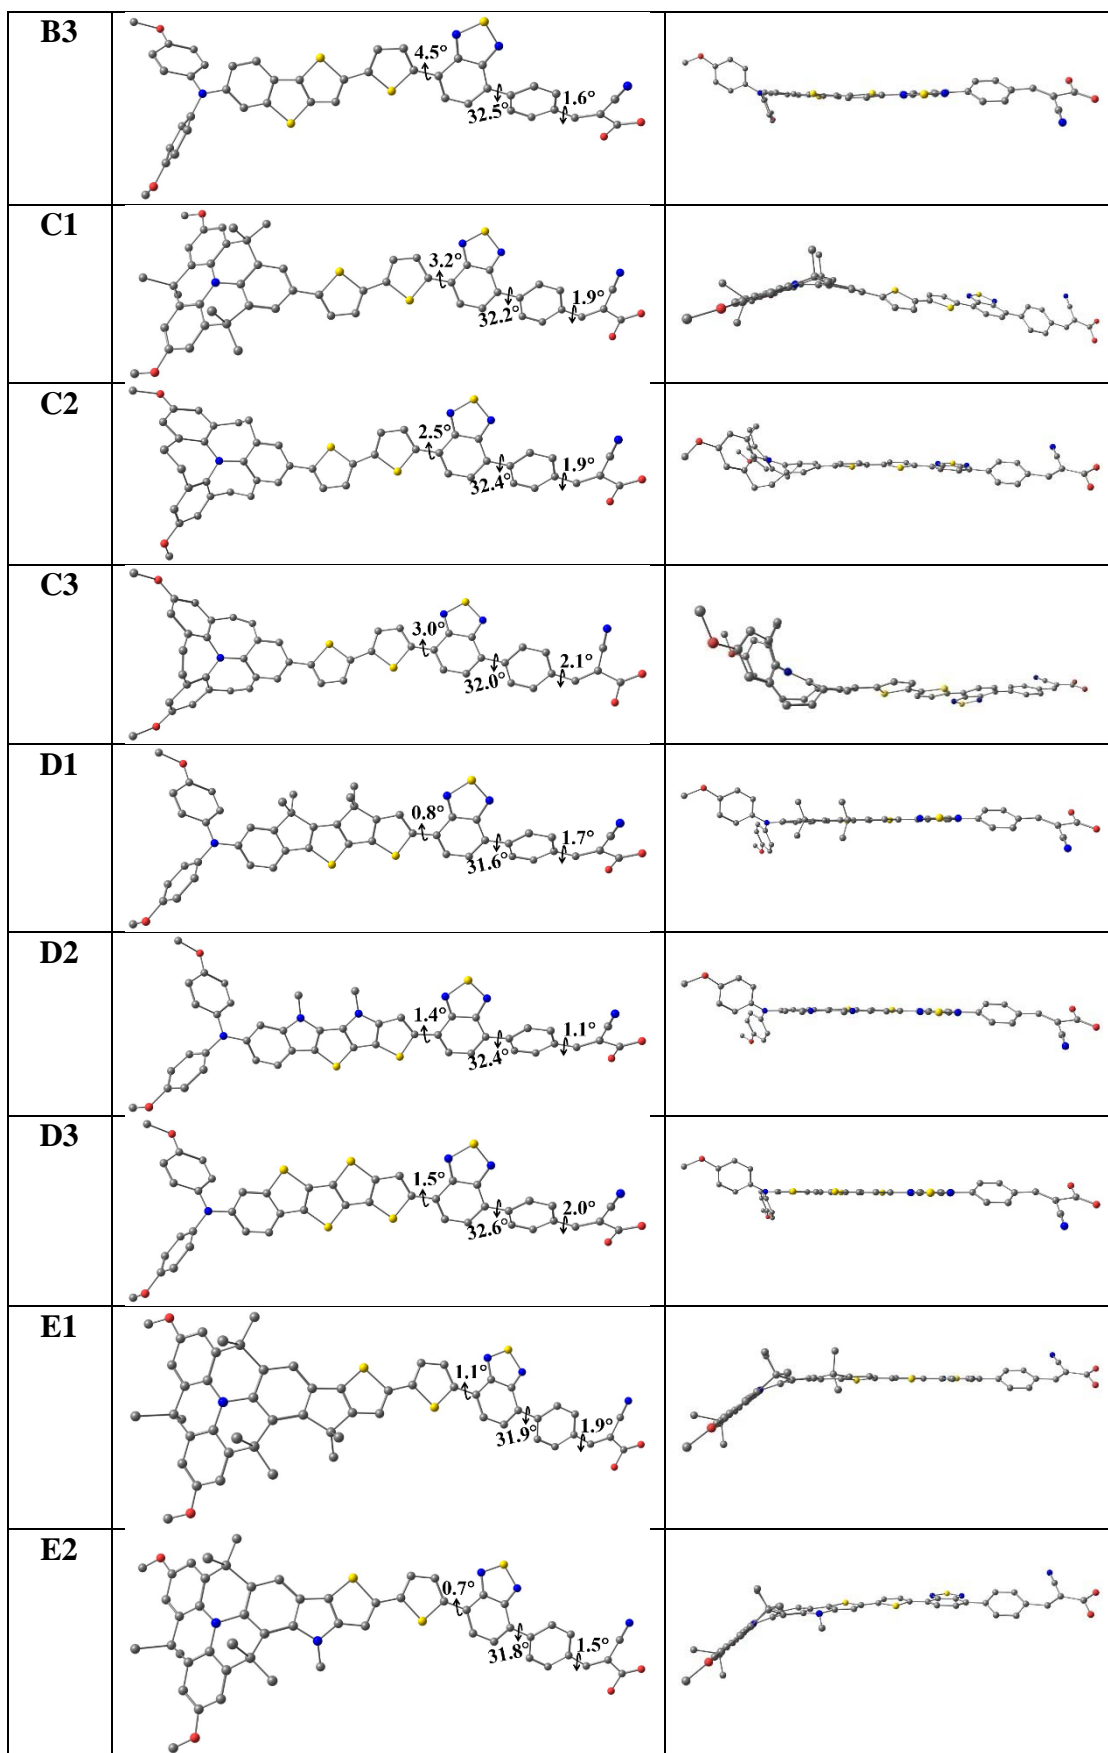

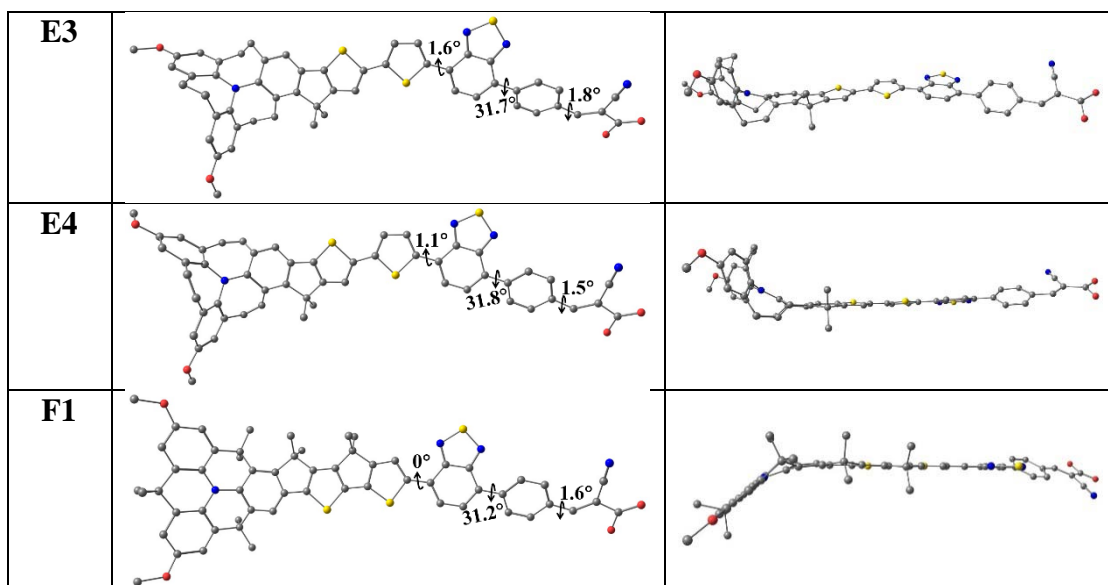

**Fig. S4** Optimized structures of all the designed dyes from top and side views.

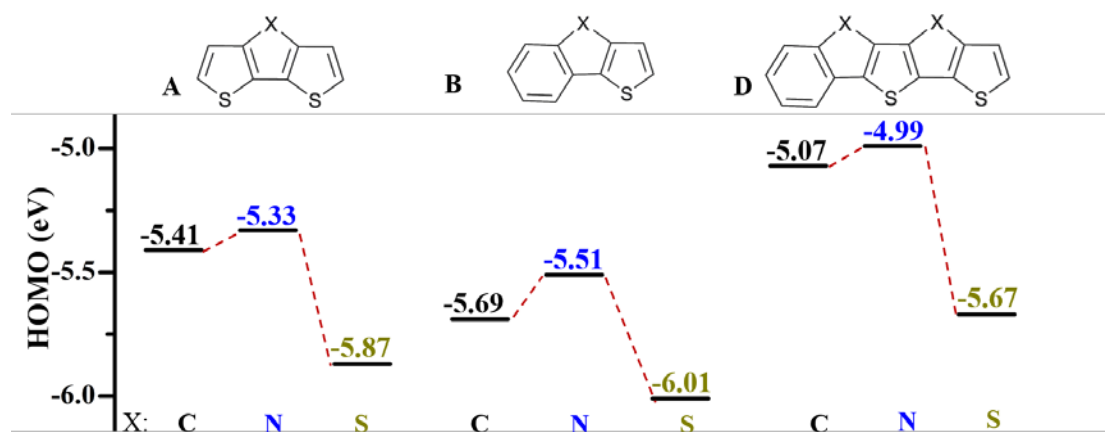

**Fig. S5** Calculated energy levels of HOMO for the series dyes A, B and D.

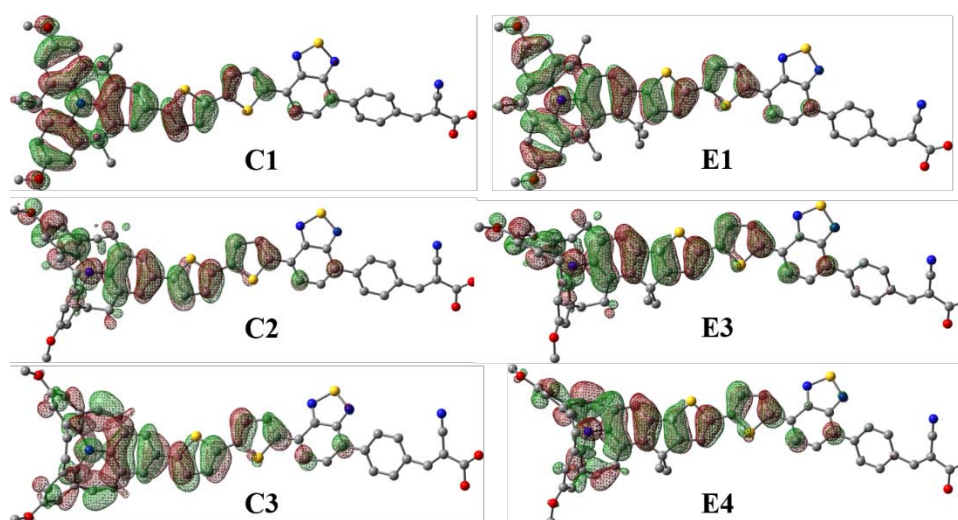

**Fig. S6** Spatial distributions of HOMO of some selected dyes (Saturated H atoms are not shown).

**Table S1** Calculated HOMO energy levels of dyes **1** and **2** in dichloromethane (CH<sub>2</sub>Cl<sub>2</sub>) with functionals of B3LYP, PBE0 and PBE38, and corresponding experimental values. (Unit: eV)

|          | B3LYP (20% HF <sub>exc</sub> ) | PBE0 (25% HF <sub>exc</sub> ) | PBE38 (37.5% HF <sub>exc</sub> ) | Exp.  |
|----------|--------------------------------|-------------------------------|----------------------------------|-------|
| <b>1</b> | -4.81                          | -5.05                         | -5.47                            | -5.22 |
| <b>2</b> | -4.75                          | -4.93                         | -5.44                            | -5.14 |

**Table S2** Effects of the functional used on the maximum absorption wavelengths ( $\lambda_{\max}$ , nm) of dyes **1** and **2** in CH<sub>2</sub>Cl<sub>2</sub> solution, with available experimental results. The values denote the percentage of nonlocal Hartree-Fock exchange (HF<sub>exc</sub>) in parentheses.

|          | B3LYP (20%) | PBE0 (25%) | PBE0-1/3 (33.3%) | MPW1K (42.8%) | BHandHLYP (50%) | CAM-B3LYP (19-65%) | $\omega$ B97XD (22-100%) | Exp. |
|----------|-------------|------------|------------------|---------------|-----------------|--------------------|--------------------------|------|
| <b>1</b> | 900         | 809        | 693              | 608           | 570             | 548                | 519                      | 570  |
| <b>2</b> | 777         | 697        | 602              | 537           | 509             | 491                | 468                      | 515  |

**Table S3** Computed  $Q_{\text{HOMO}}$ , maximum absorption wavelengths ( $\lambda_{\max}$ , nm), excitation energies ( $E_{\lambda_{\max}}$ , eV), oscillator strengths (f), light harvesting efficiency ( $\Phi_{\text{LHE}}$ ), normalized integrated spectral area (S) and the lifetimes  $\tau$  of the S<sub>1</sub> excited state for the designed dyes **3T**, **4T** and reference dye **2**.

| Compd.    | $Q_{\text{HOMO}}(\%)$ | $\lambda_{\max}$ | $E_{\lambda_{\max}}$ | f    | $\Phi_{\text{LHE}}$ | S    | $\tau(\times 10^{-9} \text{ s})$ |
|-----------|-----------------------|------------------|----------------------|------|---------------------|------|----------------------------------|
| <b>2</b>  | 0.25                  | 509              | 2.43                 | 1.84 | 0.99                | 1    | 2.13                             |
| <b>3T</b> | 0.14                  | 519              | 2.39                 | 2.20 | 0.99                | 1.29 | 1.84                             |
| <b>4T</b> | 0.08                  | 519              | 2.39                 | 2.57 | 0.99                | 1.55 | 1.58                             |

**Table S4** Computed energy levels of LUMO, the lifetimes  $\tau$  of the S<sub>1</sub> excited state and dominant excitations corresponding to S<sub>0</sub>→S<sub>1</sub> for the series dyes **A-F**.

| Compd.    | LUMO  | $E_{\lambda_{\max}}$ | $r^2$ | $\tau(\times 10^{-9} \text{ s})$ | Transition and composition |
|-----------|-------|----------------------|-------|----------------------------------|----------------------------|
| <b>A1</b> | -2.77 | 2.24                 | 33.54 | 2.49                             | H→L (0.68); H-1→L (0.18)   |
| <b>A2</b> | -2.75 | 2.27                 | 32.74 | 2.47                             | H→L (0.71); H-1→L (0.17)   |
| <b>A3</b> | -2.86 | 2.44                 | 30.76 | 2.10                             | H→L (0.58); H-1→L (0.29)   |
| <b>B1</b> | -2.82 | 2.31                 | 32.34 | 2.36                             | H→L (0.64); H-1→L (0.21)   |
| <b>B2</b> | -2.83 | 2.30                 | 31.26 | 2.48                             | H→L (0.66); H-1→L (0.19)   |
| <b>B3</b> | -2.88 | 2.42                 | 31.74 | 2.09                             | H→L (0.58); H-1→L (0.27)   |
| <b>C1</b> | -2.83 | 2.41                 | 31.04 | 2.19                             | H→L (0.53); H-1→L (0.32)   |

|           |       |      |       |      |                          |
|-----------|-------|------|-------|------|--------------------------|
| <b>C2</b> | -2.81 | 2.41 | 31.24 | 2.16 | H→L (0.61); H-1→L (0.24) |
| <b>C3</b> | -2.80 | 2.32 | 32.70 | 2.31 | H→L (0.64); H-1→L (0.21) |
| <b>D1</b> | -2.76 | 2.15 | 35.57 | 2.68 | H→L (0.73); H-1→L (0.14) |
| <b>D2</b> | -2.77 | 2.19 | 32.39 | 2.77 | H→L (0.74); H-1→L (0.15) |
| <b>D3</b> | -2.90 | 2.44 | 31.89 | 2.03 | H→L (0.61); H-1→L (0.26) |
| <b>E1</b> | -2.80 | 2.25 | 32.89 | 2.52 | H→L (0.66); H-1→L (0.19) |
| <b>E2</b> | -2.83 | 2.24 | 36.61 | 2.58 | H→L (0.68); H-1→L (0.17) |
| <b>E3</b> | -2.78 | 2.24 | 33.26 | 2.53 | H→L (0.71); H-1→L (0.15) |
| <b>E4</b> | -2.76 | 2.17 | 34.10 | 2.69 | H→L (0.72); H-1→L (0.14) |
| <b>F1</b> | -2.74 | 2.10 | 36.27 | 2.81 | H→L (0.73); H-1→L (0.14) |

**Table S5** Calculated  $\Lambda$ ,  $\Delta G^0$ , EXP and  $\frac{exp}{\sqrt{\Lambda}}$  values for reference dye **2** and dyes **A1**, **B1** and **C1**.

| Dye       | $\Lambda_{in}$ | $\Lambda_{out}$ | $\Lambda$ | $\Delta G^0$ | EXP   | $\frac{exp}{\sqrt{\Lambda}}$ |
|-----------|----------------|-----------------|-----------|--------------|-------|------------------------------|
| <b>2</b>  | 0.114          | 0.544           | 0.658     | -0.712       | 0.990 | 1.22                         |
| <b>A1</b> | 0.115          | 0.508           | 0.623     | -0.594       | 0.987 | 1.25                         |
| <b>B1</b> | 0.096          | 0.509           | 0.605     | -0.577       | 0.987 | 1.27                         |
| <b>C1</b> | 0.114          | 0.514           | 0.628     | -0.553       | 0.916 | 1.16                         |

### On the calculation of the lifetime ( $\tau$ ) of the $S_1$ excited state

The lifetime of spontaneous luminescence for the dyes are evaluated approximately by the formula:<sup>1, 2</sup>

$$\tau = \frac{1}{A_{k,k'}}, A_{k,k'} = \frac{4e^2 \Delta E_{k,k'}^3}{3\hbar^4 c^3} |r_{k,k'}|^2$$

where  $A_{k,k'}$  is Einstein coefficient for spontaneous emission,  $e$  is the elementary charge,  $\hbar$  is the reduced Planck's constant, and  $c$  is the speed of light in vacuum,  $\Delta E_{k,k'}$  and  $r_{k,k'}$  represent the transition energy and transition dipole moment from states  $k$  to  $k'$ , respectively.

### References:

- 1 L.-N. Yang, Z.-Z. Sun, S.-L. Chen and Z.-S. Li, *Dyes Pigments*, 2013, **99**, 29 – 35.
- 2 S.-L. Chen, L.-N. Yang and Z.-S. Li, *J. Power Sources*, 2013, **223**, 86 – 93
